# Supplementary material for: Quantitative Trait Loci for Genotype and Genotype by Environment Interaction Effects for Seed Yield Plasticity to Terminal Water-Deficit Conditions in Canola (Brassica napus L.)
Source: MDPI journal article supplement (doi:10.3390/plants12040720), 2023-02-06
Supplement: s1 [file s1]

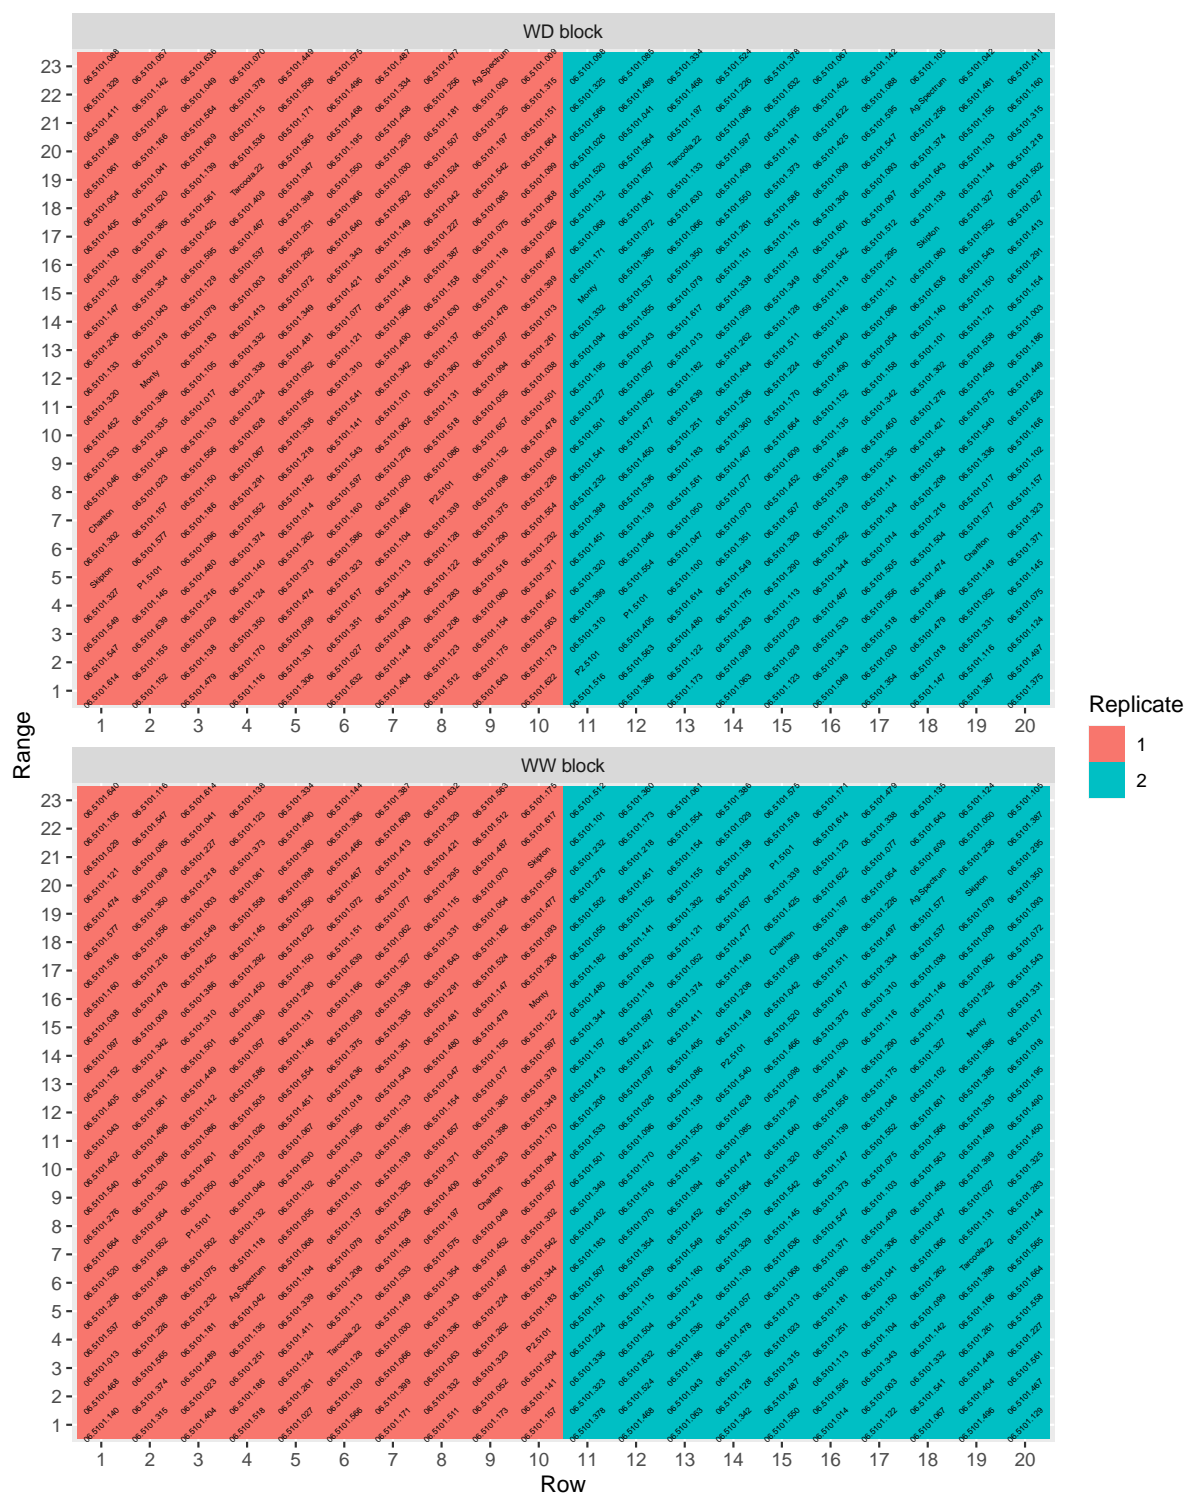

**Supplementary Figure S2:** Layout of the experimental design and allocation of parental lines, doubled haploid lines and check cultivars, and water regimes (WW: well-watered; WD: water-deficit).
