# Supplementary material for: Quantitative Trait Loci for Genotype and Genotype by Environment Interaction Effects for Seed Yield Plasticity to Terminal Water-Deficit Conditions in Canola (Brassica napus L.)
Source: MDPI journal article supplement (doi:10.3390/plants12040720), 2023-02-06
Supplement: s1 [file s1]

**Supplementary Table S1:** Summary of the baseline models fitted for each trait with the variance model for genotype by environment (GE) effects, number of parameters estimated in each model in total (Total) and for the genetic variance (Genetic), log-likelihood (LogLik) and Akaike Information Criterion (AIC). DIAG: Diagonal; FA1: Factor analytic structure of order 1; FA1:FA1: Factor analytic structures of order 1 for both the between environment variance matrices of the GE additive genetic effects and non-additive genetic effects. For Baseline factor analytic linear mixed model (FALMM) and Baseline FALMM with markers specific genotype by environment (SGE) effects for water-deficit (WD) block was constrained to be zero for both additive and non-additive genetic effects. SY: Seed yield, PH: Plant height; SPAD: Chlorophyll content; DTF: Days to flower.

| Model                       | Variance model for GE effects | Parameters |         | LogLik    | AIC      |
|-----------------------------|-------------------------------|------------|---------|-----------|----------|
|                             |                               | Total      | Genetic |           |          |
| SY                          |                               |            |         |           |          |
| Baseline LMM                | DIAG                          | 10         | 2       | -4202.67  | 8425.34  |
| Baseline FALMM              | FA1                           | 13         | 3       | -4179.05  | 8384.10  |
| Baseline FALMM with markers | FA1:FA1                       | 18         | 6       | -4165.30  | 8366.60  |
| PH                          |                               |            |         |           |          |
| Baseline LMM                | DIAG                          | 12         | 2       | -13695.66 | 27415.32 |
| Baseline FALMM              | FA1                           | 15         | 3       | -13640.13 | 27310.26 |
| Baseline FALMM with markers | FA1:FA1                       | 20         | 6       | -13626.59 | 27293.19 |
| SPAD                        |                               |            |         |           |          |
| Baseline LMM                | DIAG                          | 10         | 2       | -2081.4   | 4182.94  |
| Baseline FALMM              | FA1                           | 13         | 3       | -2066.77  | 4159.53  |
| Baseline FALMM with markers | FA1:FA1                       | 18         | 6       | -2051.50  | 4139.00  |
| DTF                         |                               |            |         |           |          |
| Baseline LMM                | -                             | 6          | 1       | -2703.91  | 5419.82  |
| Baseline LMM with markers   | -                             | 7          | 2       | -2614.90  | 5243.79  |
