# Supplementary material for: Quantitative Trait Loci for Genotype and Genotype by Environment Interaction Effects for Seed Yield Plasticity to Terminal Water-Deficit Conditions in Canola (Brassica napus L.)
Source: Plants (Basel). 2023 Feb 6;12(4):720. doi: 10.3390/plants12040720 (PMC9964187; doi:10.3390/plants12040720)
Supplement: Supplementary file 1 [file plants-12-00720-s001.zip]

Archive with 5 entries (5 files):
- Supplemenatry Table S1.pdf
- Supplemenatry Table S2.xlsx
- Supplementary Figure S1.pdf
- Supplementary Figure S2.pdf
- Supplementary Method S1.pdf
