# Supplementary material for: Quantitative Trait Loci for Genotype and Genotype by Environment Interaction Effects for Seed Yield Plasticity to Terminal Water-Deficit Conditions in Canola (Brassica napus L.)
Source: Plants (Basel). 2023 Feb 6;12(4):720. doi: 10.3390/plants12040720 (PMC9964187; doi:10.3390/plants12040720)
Supplement: Supplementary file 1 [file plants-12-00720-s001.zip › Supplemenatry Table S2.xlsx]

## Sheet: Sheet1
Supplementary Table S2: Identification of QTL for carbon isotope discrimination and agronomic traits evaluated in a doubled haploid population derived from BC1329/BC9102 across three environments. QTL for main effects and for QTL by Environment interactions are shown (column B; M: main effect; FT17, FT18, ROS17, WD block and WW block relate to individual environment, FT17: field trial 2017; FT18:…
Trait	Environment	Marker	Chromosome	Physical map position of ‘Top’ marker on Darmor-bzh genome version 4.1	LOD	R2	Allelic effect	Parental allele	Reference	Closest QTL that was mapped previously (bp)
NDVI	M	3117901|F|0-11:T>C-11:T>C	A01	2276244	2.79	5.87	0.02	BC1329	Raman et al (2022)
SY	M	27390647|F|0-42:G>A-42:G>A	A01	3895510	4.17	8.37	-0.06	BC9102	Raman et al (2022)
DTF	M	4106850|F|0-28:G>A-28:G>A	A01	3911345	4.18	12.73	1.27	BC1329	Raman et al (2022)
PH	M	4106850|F|0-28:G>A-28:G>A	A01	3911345	4.54	11	-2.64	BC9102	Raman et al (2022)
DTF	M	4167999|F|0-65:C>G-65:C>G	A01	4038480	4.15	9.11	2.41	BC1329	This study	127135
SPAD	M	3089844|F|0-24:G>C-24:G>C	A01	7826453	2.61	11.05	0.77	BC1329	This study
Δ13C	FT17	3136246	A02	9421348	2.4	0.47	0.06	BC1329	Raman et al (2022)
Δ13C	FT18	3136246	A02	9421348	2.4	0.47	-0.05	BC9102	Raman et al (2022)
Δ13C	ROS17	3136246	A02	9421348	2.4	0.47	0.05	BC1329	Raman et al (2022)
SY	WD Block	3173313	A02	19738340	2.76	1.13	3.91	BC1329	This study
SY	WW Block	3173313	A02	19738340	2.76	1.13	-12.86	BC9102	This study
SPAD	M	26680018	A02	23433061	5.79	27.15	-1.3	BC9102	This study
SPAD	M	3095732|F|0-21:C>A-21:C>A	A03	1882135	2.72	9.44	-0.78	BC9102	This study
DTF	FT17	3099499	A05	22326705	4.66	4.53	-0.05	BC9102	Raman et al (2022)
DTF	FT18	3099499	A05	22326705	4.66	4.53	0.63	BC1329	Raman et al (2022)
DTF	ROS17	3099499	A05	22326705	4.66	4.53	-0.31	BC9102	Raman et al (2022)
Δ13C	M	3098654|F|0-12:G>A-12:G>A	A07	10641571	2.76	7.46	-0.09	BC9102	Raman et al (2022)
SY	M	3140140	A08	11695725	4.26	1.87	14.38	BC1329	This study	72087
PH	M	3190876|F|0-10:T>A-10:T>A	A08	11767812	6.77	8.7	3.34	BC1329	Raman et al (2022)
SY	M	3190876|F|0-10:T>A-10:T>A	A08	11767812	4.84	10.76	0.06	BC1329	Raman et al (2022)
DTF	FT17	3094094|F|0-7:T>C-7:T>C	A08	12291497	4.63	5.31	-0.21	BC9102	Raman et al (2022)
DTF	FT18	3094094|F|0-7:T>C-7:T>C	A08	12291497	4.63	5.31	-0.58	BC9102	Raman et al (2022)
DTF	ROS17	3094094|F|0-7:T>C-7:T>C	A08	12291497	4.63	5.31	-1.09	BC9102	Raman et al (2022)
Δ13C	M	3087427|F|0-17:C>G-17:C>G	A08	13909331	4.57	10.86	0.14	BC1329	Raman et al (2022)
DTF	M	3127058|F|0-24:G>T-24:G>T	A08	14772748	4.41	14.26	-2.24	BC9102	This study	2481251
SPAD	M	3083376|F|0-17:A>G-17:A>G	A09	26477098	4.58	16.46	1.01	BC1329	This study
DTF	M	3153720	A09	29356333	4.31	17.81	2.19	BC1329	This study	0
SY	M	3153720	A09	29356333	3.02	4.23	-11.92	BC9102	This study	0
Δ13C	M	3153720	A09	29356333	9.57	21.3	-0.19	BC9102	Raman et al (2022)
DTF	M	3153720	A09	29356333	3.01	11.84	1.04	BC1329	Raman et al (2022)
PH	M	3153720	A09	29356333	6.91	10.09	-3.36	BC9102	Raman et al (2022)
SY	M	3153720	A09	29356333	3.87	7.73	-0.05	BC9102	Raman et al (2022)
SY	FT17	3157596|F|0-40:A>T-40:A>T	A10	2098908	2.19	2.66	0.05	BC1329	Raman et al (2022)
SY	FT18	3157596|F|0-40:A>T-40:A>T	A10	2098908	2.19	2.66	0.02	BC1329	Raman et al (2022)
DTF	M	3140774|F|0-65:T>A-65:T>A	A10	12312336	3.15	17.58	-2.44	BC9102	This study	279173
DTF	M	3148204|F|0-11:A>G-11:A>G	A10	12591509	2.87	15.32	-1.08	BC9102	Raman et al (2022)
SPAD	M	3083310|F|0-11:A>T-11:A>T	A10	16253199	5.06	24.39	-1.14	BC9102	This study
DTF	M	4333486	C02	2170435	2.57	5.96	-0.92	BC9102	Raman et al (2022)	7116661
DTF	M	3128614	C02	9287096	3.88	13.04	-2.25	BC9102	This study	7116661
DTF	FT17	5029594	C02	19879821	4.03	3.51	0.01	BC1329	Raman et al (2022)
DTF	FT18	5029594	C02	19879821	4.03	3.51	-0.68	BC9102	Raman et al (2022)
DTF	ROS17	5029594	C02	19879821	4.03	3.51	-0.08	BC9102	Raman et al (2022)
DTF	M	3143291	C02	45636489	9.95	26.7	-3.31	BC9102	This study	25756668
DTF	FT17	27246491	C02_random	841803	7.68	16.93	-2.06	BC9102	Raman et al (2022)
DTF	FT18	27246491	C02_random	841803	7.68	16.93	-1.68	BC9102	Raman et al (2022)
DTF	ROS17	27246491	C02_random	841803	7.68	16.93	-0.89	BC9102	Raman et al (2022)
SY	FT17	5708989	C03	415622	2.56	4.22	0.06	BC1329	Raman et al (2022)
SY	FT18	5708989	C03	415622	2.56	4.22	0.03	BC1329	Raman et al (2022)
SY	M	3101614|F|0-46:C>T-46:C>T	C03	3138929	2.35	4.61	9.94	BC1329	This study	107321
PH	FT17	3107367	C03	3246250	3.04	5.45	2.07	BC1329	Raman et al (2022)
PH	FT18	3107367	C03	3246250	3.04	5.45	3.11	BC1329	Raman et al (2022)
PH	ROS17	3107367	C03	3246250	3.04	5.45	0.85	BC1329	Raman et al (2022)
PH	M	5150480|F|0-27:G>A-27:G>A	C03	23396698	2.82	3.36	3.46	BC1329	This study	20150448
PH	M	3097029|F|0-10:C>T-10:C>T	C03	57776378	2.75	4.68	3.34	BC1329	This study
SPAD	M	27390133	C05	539869	4.72	19.51	-0.98	BC9102	This study
Δ13C	FT17	3098622|F|0-17:G>T-17:G>T	C06	14048757	3.07	2.05	0.15	BC1329	Raman et al (2022)
Δ13C	FT18	3098622|F|0-17:G>T-17:G>T	C06	14048757	3.07	2.05	0.02	BC1329	Raman et al (2022)
Δ13C	ROS17	3098622|F|0-17:G>T-17:G>T	C06	14048757	3.07	2.05	0.03	BC1329	Raman et al (2022)
NDVI	M	3140998|F|0-9:A>G-9:A>G	C06	18209584	4.46	7.27	0.03	BC1329	Raman et al (2022)
DTF	M	3141556	C06	27740738	12.17	39.12	-4.13	BC9102	This study	1767436
DTF	FT17	3108047	C06	29508174	9.97	42.45	-2.19	BC9102	Raman et al (2022)
DTF	FT18	3108047	C06	29508174	9.97	42.45	-3.06	BC9102	Raman et al (2022)
DTF	ROS17	3108047	C06	29508174	9.97	42.45	-3.35	BC9102	Raman et al (2022)
SY	M	27246553	C06	35071983	6.33	8.81	0.07	BC1329	Raman et al (2022)
PH	M	3147080	C07	30323351	2.36	3.66	2.41	BC1329	Raman et al (2022)
PH	FT17	4109886|F|0-23:G>A-23:G>A	C07	35011549	2.48	0.42	0.09	BC1329	Raman et al (2022)
PH	FT18	4109886|F|0-23:G>A-23:G>A	C07	35011549	2.48	0.42	1.03	BC1329	Raman et al (2022)
PH	ROS17	4109886|F|0-23:G>A-23:G>A	C07	35011549	2.48	0.42	-0.91	BC9102	Raman et al (2022)
DTF	M	5053011|F|0-62:G>A-62:G>A	C08	22278532	2.06	7.12	-0.88	BC9102	Raman et al (2022)
SY	WD Block	5121657	C09	41790279	2	0.74	-3.71	BC9102	This study	5458510
SY	WW Block	5121657	C09	41790279	2	0.74	9.99	BC1329	This study	5458510
DTF	M	3158874	C09	46623311	16.66	48.55	5.06	BC1329	This study	625544
Δ13C	M	3158874	C09	46623311	6.57	18.51	-0.17	BC9102	Raman et al (2022)
SY	FT17	3094517	C09	47248789	2.9	4.79	-0.02	BC9102	Raman et al (2022)
SY	FT18	3094517	C09	47248789	2.9	4.79	-0.05	BC9102	Raman et al (2022)
DTF	FT17	5053896|F|0-29:A>G-29:A>G	C09	47248855	4.57	48.49	2.36	BC1329	Raman et al (2022)
DTF	FT18	5053896|F|0-29:A>G-29:A>G	C09	47248855	4.57	48.49	3.1	BC1329	Raman et al (2022)
DTF	ROS17	5053896|F|0-29:A>G-29:A>G	C09	47248855	4.57	48.49	2.65	BC1329	Raman et al (2022)
PH	FT17	3096040|F|0-56:T>A-56:T>A	C09	47466209	5.99	1.97	0.13	BC1329	Raman et al (2022)
PH	FT18	3096040|F|0-56:T>A-56:T>A	C09	47466209	5.99	1.97	-2.08	BC9102	Raman et al (2022)
PH	ROS17	3096040|F|0-56:T>A-56:T>A	C09	47466209	5.99	1.97	-0.5	BC9102	Raman et al (2022)
PH	M	27247510	C09	48143335	3.3	6	3.76	BC1329	This study
SPAD	M	3101645|F|0-42:G>A-42:G>A	C09	48490657	3.48	14.94	0.87	BC1329	This study
DTF	M	3152507	C09_ran	3981494	4.21	14.02	1.39	BC1329	Raman et al (2022)
